# Supplementary material for: Colonic Injuries Induced by Inhalational Exposure to Particulate‐Matter Air Pollution
Source: PubMed Central journal article supplement (PMC6548988; doi:10.1002/advs.201900180), 2019-04-09
Supplement: ADVS-6-1900180-s001.pdf [file ADVS-6-1900180-s001.pdf]

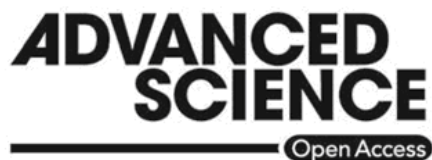

## Supporting Information

for *Adv. Sci.*, DOI: 10.1002/advs.201900180

### Colonic Injuries Induced by Inhalational Exposure to Particulate-Matter Air Pollution

*Xiaobo Li, Jian Cui, Hongbao Yang, Hao Sun, Runze Lu,  
Na Gao, Qingtao Meng, Shenshen Wu, Jiong Wu, Michael  
Aschner, and Rui Chen\**

Copyright WILEY-VCH Verlag GmbH & Co. KGaA, 69469 Weinheim, Germany, 2019.

## Supporting Information

### **Inhalational Exposure of Particulate Matter Air Pollution Induced Colonic Injuries**

*Xiaobo Li<sup>1</sup>, Jian Cui<sup>1</sup>, Hongbao Yang<sup>2</sup>, Hao Sun<sup>1</sup>, Runze Lu<sup>1</sup>, Na Gao<sup>1</sup>, Qingtao Meng<sup>1</sup>,  
Shenshen Wu<sup>1</sup>, Jiong Wu<sup>3</sup>, Michael Aschner<sup>4</sup>, Rui Chen<sup>1, 5\*</sup>*

**Figure S1 Inflammatory response induced by PM exposure.** A: Plasma levels of IL-6  
 B: TNF- $\alpha$  and C: IL-1 $\beta$  (mean  $\pm$  SE,  $n=3$ , two-way ANOVA followed by  
 Bonferroni post hoc). D: mRNA expression levels of p65; E: Stat3, F: Relb and G:  
 Nrf2 in murine colonic tissues ( $n=8$ , two-way ANOVA). \*  $P<0.05$ , \*\*  $P<0.01$ ,  
 \*\*\*  $P<0.001$

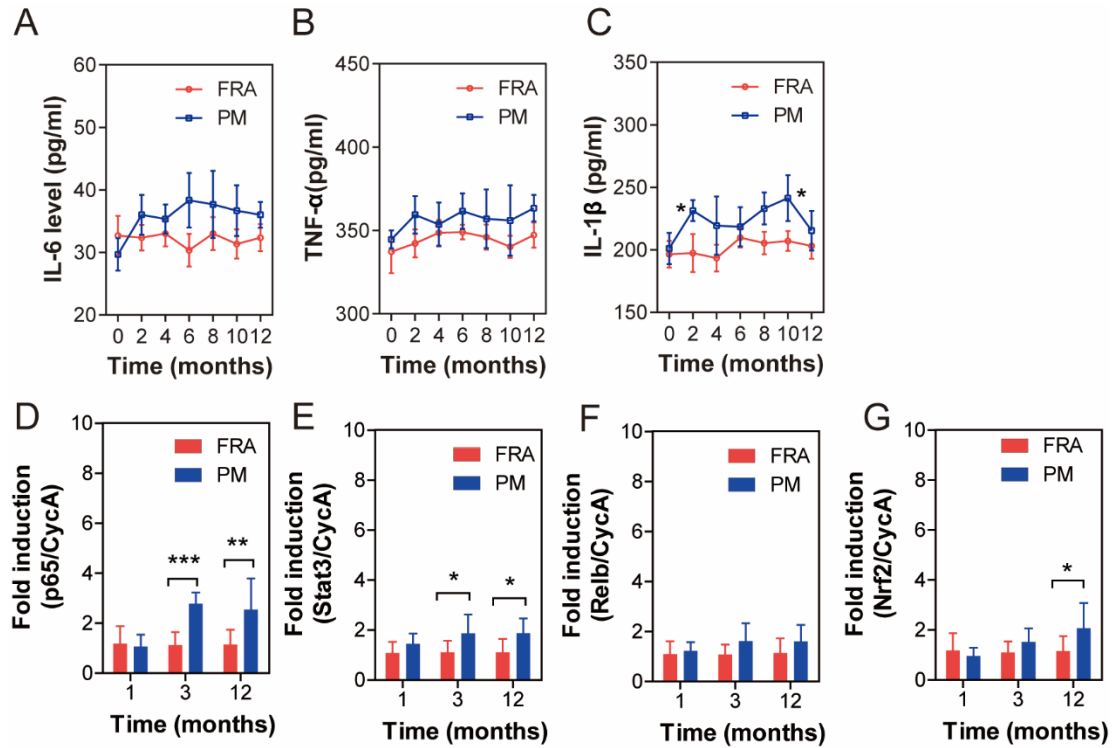

**Figure S2: *Fgfr4*<sup>-/-</sup> mice are resistant to PM exposure-induced colonic inflammation.**

A: Representative images of colonic sections stained by H&E, PAS and Alcian blue following 12-months of PM exposure. The epithelial injury and inflammatory infiltration area was highlighted with yellow broken line border. B: Score of epithelial injury and C: inflammatory infiltration increased in PM-exposed colonic tissues ( $n=5$ , two-way ANOVA). D: Representative images of anti-FGFR4 and anti-p65 staining of murine colons following 12 months of PM exposure. E: The IHC score of FGFR4 and F: p65 expressions. ( $n=9$  (3 non-overlapping HPFs per mouse), two-way ANOVA) \*\*\*  $P<0.001$

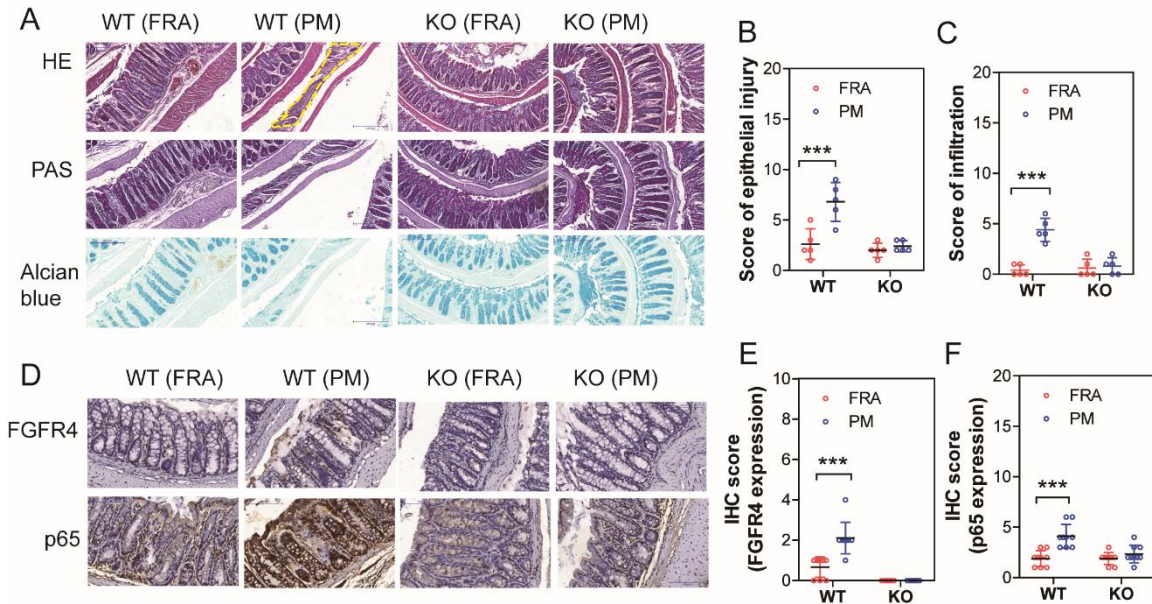

**Figure S3 FGFR4 is an up-stream driver of PM exposure-induced neoplasia**

A: Inhibition of FGFR4 expression significantly decreased number of colonies of NCM460 cells ( $n=6$ , unpaired  $t$  test). B: Representative images of Transwell assays. C: The migration and invasion capacities of NCM460 cells were significantly decreased following inhibition of FGFR4 expression levels ( $n=3$ , Wilcoxon rank sum test). D: Suppression of FGFR4 decreased the volume of subcutaneous tumors. E: The metastatic potential to liver and lung for flank tumors in mice were significantly decreased ( $n=6$ , unpaired  $t$  test). F: Representative images of H&E staining on lung tissue sections from mice injected with NCM460 cells (infected with or without FGFR4 siRNA) through tail vein. \*  $P<0.05$ , \*\*  $P<0.01$ , \*\*\*  $P<0.001$

**A**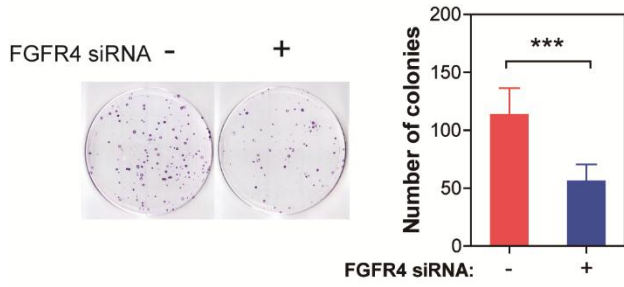**B**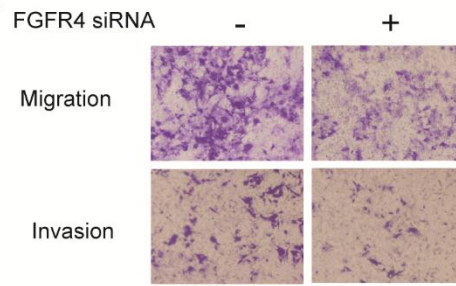**C**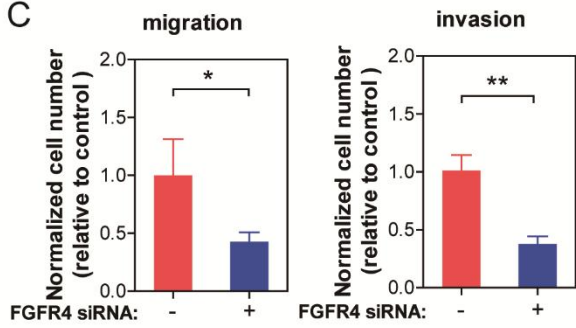**D**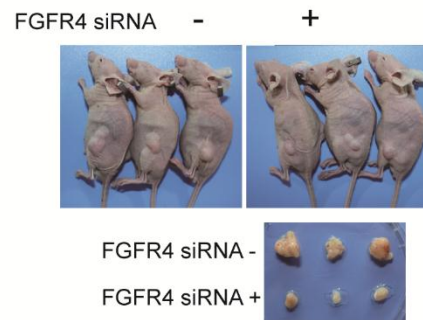**E**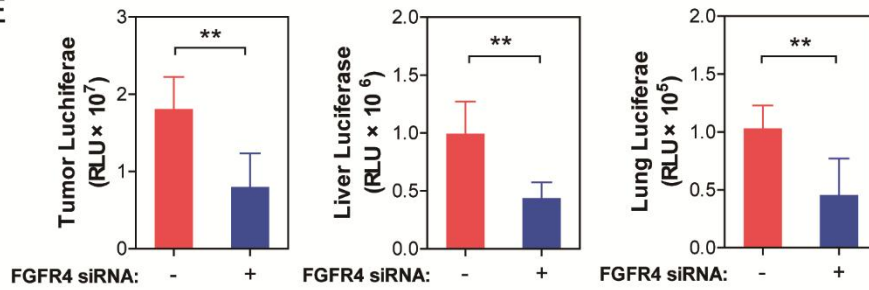**F**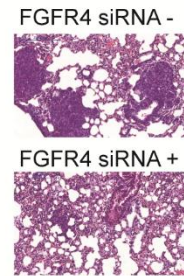

**Figure S4 Curcumin rescued mRNA expression to control levels in long-term PM-treated NCM460 cells.**

A: Curcumin (20  $\mu\text{M}$ ) supplementation completely rescued FGFR4, PDGFB, CASP9 and SGK1 mRNA expression to control levels in long-term PM-treated NCM460 cells ( $n=6$ , two-way ANOVA). B: Relative to control, DHA (50  $\mu\text{M}$ ) supplementation partially rescued FGFR4 and CASP9 mRNA expression levels in long-term PM-treated NCM460 cells ( $n=6$ , two-way ANOVA). C:  $1\alpha 25(\text{OH})_2 \text{D}_3$  (100 nM) supplementation did not modulate mRNA expression levels in long-term PM-treated NCM460 cells ( $n=6$ , one-way ANOVA) (\*  $P<0.05$ , \*\*  $P<0.01$ , \*\*\*  $P<0.001$ ).

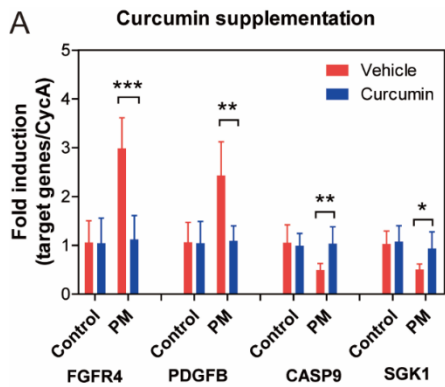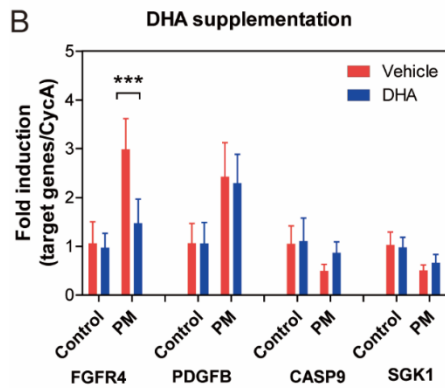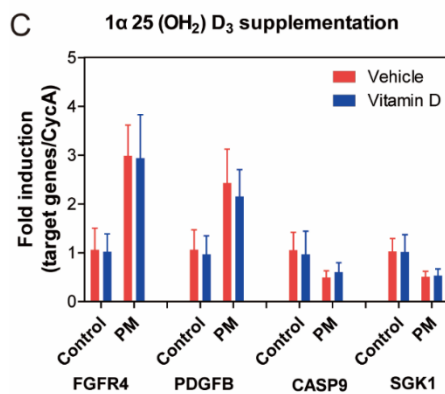

Table S1 Characteristics of subjects participating in the study <sup>a)</sup>

| <b>Variable</b> | <b>n</b> | <b>Mean</b> | <b>SD</b> | <b>min</b> | <b>25th</b> | <b>median</b> | <b>75th</b> | <b>max</b> | <b>IQR</b> |
|-----------------|----------|-------------|-----------|------------|-------------|---------------|-------------|------------|------------|
| Age             | 45       | 23.2        | 2.3       | 19.0       | 21.0        | 23.0          | 25.0        | 27.0       | 4.0        |
| BMI             | 45       | 21.4        | 1.6       | 17.4       | 20.1        | 21.6          | 22.5        | 25.3       | 2.3        |
| IL-6            | 324      | 7.2         | 1.0       | 5.1        | 6.4         | 7.2           | 7.95        | 9.5        | 1.6        |
| WBC/HPF         | 500      | 0.5         | 0.9       | 0.0        | 0.0         | 0.0           | 1.0         | 5.0        | 1.0        |

<sup>a)</sup> Abbreviations: BMI, body mass index; WBC, white blood cell; HPF, high power field

Table S2. Descriptive statistics of criteria air pollutants over the study period

| <b>Variable</b>   | <b>n</b> | <b>Mean</b> | <b>SD</b> | <b>min</b> | <b>25th</b> | <b>median</b> | <b>75th</b> | <b>max</b> | <b>IQR</b> |
|-------------------|----------|-------------|-----------|------------|-------------|---------------|-------------|------------|------------|
| PM <sub>2.5</sub> | 57       | 84.1        | 58.1      | 12.0       | 36.0        | 63.0          | 119.0       | 256.0      | 83.0       |
| PM <sub>10</sub>  | 57       | 126.7       | 72.6      | 18.0       | 69.0        | 116.0         | 166.0       | 347.0      | 97.0       |
| NO <sub>2</sub>   | 57       | 15.0        | 5.5       | 5.0        | 11.0        | 16.0          | 19.0        | 26.0       | 8.0        |
| SO <sub>2</sub>   | 57       | 63.1        | 23.9      | 25.0       | 42.0        | 64.0          | 83.0        | 126.0      | 41.0       |
| CO                | 57       | 1.1         | 0.4       | 0.5        | 0.8         | 1.0           | 1.3         | 2.3        | 0.5        |
| O <sub>3</sub>    | 57       | 34.5        | 16.3      | 8.0        | 23.0        | 34.0          | 45.0        | 71.0       | 22.0       |



Table S3 Correlation analysis between six criteria air pollutants across the study period (Spearman r)

|                         | <b>PM<sub>2.5</sub></b> | <b>PM<sub>10</sub></b> | <b>NO<sub>2</sub></b> | <b>SO<sub>2</sub></b> | <b>CO</b> | <b>O<sub>3</sub></b> |
|-------------------------|-------------------------|------------------------|-----------------------|-----------------------|-----------|----------------------|
| <b>PM<sub>2.5</sub></b> | 1.00                    |                        |                       |                       |           |                      |
| <b>PM<sub>10</sub></b>  | <b>0.96</b>             | 1.00                   |                       |                       |           |                      |
| <b>NO<sub>2</sub></b>   | 0.32                    | <b>0.50</b>            | 1.00                  |                       |           |                      |
| <b>SO<sub>2</sub></b>   | <b>0.58</b>             | <b>0.67</b>            | <b>0.78</b>           | 1.00                  |           |                      |
| <b>CO</b>               | <b>0.89</b>             | <b>0.90</b>            | <b>0.55</b>           | <b>0.73</b>           | 1.00      |                      |
| <b>O<sub>3</sub></b>    | -0.20                   | -0.28                  | -0.40                 | <b>-0.60</b>          | -0.39     | 1.00                 |

Table S4 Cumulative increases in WBC/HPF measures associated with an IQR increase in air pollutant concentration

| Air pollutant           | Exposure metric | Estimate (95% confidence interval) | P value       |
|-------------------------|-----------------|------------------------------------|---------------|
| <b>PM<sub>2.5</sub></b> |                 |                                    |               |
|                         | 0-1 day         | -0.18 (-0.49 to 0.31)              | 0.3964        |
|                         | 0-2 day         | 0.34 (-0.06 to 0.90)               | 0.1002        |
|                         | 0-3 day         | 0.39 (-0.01 to 0.96)               | 0.0552        |
|                         | 0-4 day         | 0.49 (0.13 to 0.96)                | <b>0.0043</b> |
|                         | 0-5 day         | 0.63 (0.22 to 1.19)                | <b>0.0013</b> |
|                         | 0-6 day         | 1.15 (0.38 to 2.33)                | <b>0.0008</b> |
|                         | 0-7 day         | 1.17 (0.23 to 2.81)                | <b>0.0077</b> |
|                         | 0-8 day         | 0.82 (0.05 to 2.15)                | <b>0.0329</b> |
|                         | 0-9 day         | 0.59 (-0.08 to 1.75)               | 0.0962        |
|                         | 0-10 day        | 0.80 (-0.02 to 2.30)               | 0.0587        |
| <b>PM<sub>10</sub></b>  |                 |                                    |               |
|                         | 0-1 day         | -0.16 (-0.47 to 0.33)              | 0.4661        |
|                         | 0-2 day         | 0.25 (-0.07 to 0.68)               | 0.1304        |
|                         | 0-3 day         | 0.33 (-0.02 to 0.79)               | 0.076         |
|                         | 0-4 day         | 0.48 (0.13 to 0.94)                | <b>0.0054</b> |
|                         | 0-5 day         | 0.62 (0.20 to 1.19)                | <b>0.0021</b> |
|                         | 0-6 day         | 1.10 (0.34 to 2.28)                | <b>0.0015</b> |
|                         | 0-7 day         | 1.48 (0.33 to 3.62)                | <b>0.0046</b> |
|                         | 0-8 day         | 1.12 (0.14 to 2.95)                | <b>0.0183</b> |
|                         | 0-9 day         | 0.82 (-0.07 to 2.56)               | 0.0780        |
|                         | 0-10 day        | 1.10 (-0.05 to 3.65)               | 0.0660        |
| <b>NO<sub>2</sub></b>   |                 |                                    |               |
|                         | 0-1 day         | -0.21 (-0.40 to 0.03)              | 0.0778        |
|                         | 0-2 day         | -0.25 (-0.44 to 0.01)              | 0.0599        |
|                         | 0-3 day         | -0.20 (-0.43 to 0.13)              | 0.2022        |
|                         | 0-4 day         | -0.05 (-0.43 to 0.59)              | 0.8540        |
|                         | 0-5 day         | 0.15 (-0.34 to 0.98)               | 0.6204        |
|                         | 0-6 day         | 0.61 (-0.12 to 1.96)               | 0.1200        |
|                         | 0-7 day         | 0.77 (-0.04 to 2.27)               | 0.0654        |
|                         | 0-8 day         | 0.95 (-0.17 to 3.59)               | 0.1254        |
|                         | 0-9 day         | 0.47 (-0.50 to 3.37)               | 0.4821        |
|                         | 0-10 day        | -0.13 (-0.95 to 1.55)              | 0.9249        |
| <b>SO<sub>2</sub></b>   |                 |                                    |               |
|                         | 0-1 day         | -0.18 (-0.44 to 0.20)              | 0.3076        |
|                         | 0-2 day         | -0.19 (-0.47 to 0.24)              | 0.3299        |

|                      |                        |               |
|----------------------|------------------------|---------------|
| 0-3 day              | 0.09 (-0.21 to 0.51)   | 0.5804        |
| 0-4 day              | 0.23 (-0.16 to 0.79)   | 0.2849        |
| 0-5 day              | 0.41 (-0.10 to 1.19)   | 0.1292        |
| 0-6 day              | 0.85 (0.09 to 2.15)    | <b>0.0238</b> |
| 0-7 day              | 1.64 (0.28 to 4.42)    | <b>0.0089</b> |
| 0-8 day              | 3.91 (0.60 to 1.41)    | <b>0.0059</b> |
| 0-9 day              | 2.26 (-0.51 to 2.08)   | 0.2204        |
| 0-10 day             | 2.85 (-0.52 to 2.99)   | 0.2022        |
| <b>CO</b>            |                        |               |
| 0-1 day              | 0.18 (-0.23 to 0.82)   | 0.4345        |
| 0-2 day              | 0.66 (0.13 to 1.42)    | <b>0.0097</b> |
| 0-3 day              | 0.61 (0.20 to 1.16)    | <b>0.0020</b> |
| 0-4 day              | 0.56 (0.16 to 1.09)    | <b>0.0038</b> |
| 0-5 day              | 0.61 (0.17 to 1.20)    | <b>0.0037</b> |
| 0-6 day              | 0.79 (0.17 to 1.74)    | <b>0.0072</b> |
| 0-7 day              | 0.52 (-0.03 to 1.38)   | 0.0654        |
| 0-8 day              | 0.54 (-0.05 to 1.49)   | 0.0769        |
| 0-9 day              | 0.47 (-0.14 to 1.50)   | 0.1583        |
| 0-10 day             | 0.72 (-0.02 to 2.00)   | 0.0569        |
| <b>O<sub>3</sub></b> |                        |               |
| 0-1 day              | 0.15 (-0.08 to 0.44)   | 0.2282        |
| 0-2 day              | 0.14 (-0.36 to 1.07)   | 0.6503        |
| 0-3 day              | -0.79 (-0.91 to 0.71)  | <b>0.0027</b> |
| 0-4 day              | -0.87 (-0.96 to -0.55) | <b>0.0015</b> |
| 0-5 day              | -0.69 (-0.86 to -0.32) | <b>0.0041</b> |
| 0-6 day              | -0.85 (-0.95 to -0.55) | <b>0.0009</b> |
| 0-7 day              | -0.73 (-0.95 to 0.45)  | 0.1249        |
| 0-8 day              | -0.68 (-0.93 to 0.45)  | 0.1380        |
| 0-9 day              | -0.20 (-0.71 to 1.22)  | 0.6621        |
| 0-10 day             | -0.53 (-0.86 to 0.61)  | 0.2251        |

Table S5 The description of PI3K-AKT pathway involved genes

| <b>Gene symbol</b> | <b>Description</b>                                      |
|--------------------|---------------------------------------------------------|
| PIK3R3             | phosphoinositide-3-kinase, regulatory subunit 3 (gamma) |
| CSF1R              | colony stimulating factor 1 receptor                    |
| FGFR4              | fibroblast growth factor receptor 4                     |
| SGK1               | Serum/Glucocorticoid Regulated Kinase 1                 |
| CASP9              | caspase 9, apoptosis-related cysteine peptidase         |
| OSMR               | oncostatin M receptor                                   |

|         |                                                                         |
|---------|-------------------------------------------------------------------------|
| PDGFB   | platelet-derived growth factor beta polypeptide                         |
| ITGA5   | integrin, alpha 5 (fibronectin receptor, alpha polypeptide)             |
| PIK3CD  | phosphatidylinositol-4,5-bisphosphate 3-kinase, catalytic subunit delta |
| CREB3L1 | cAMP responsive element binding protein 3-like 1                        |
| TNXB    | tenascin XB                                                             |
| FN1     | fibronectin 1                                                           |
| IL4R    | interleukin 4 receptor                                                  |
| VEGFC   | vascular endothelial growth factor C                                    |
| CCND2   | cyclin D2                                                               |
| F2R     | coagulation factor II (thrombin) receptor                               |
| COL6A1  | collagen, type VI, alpha 1                                              |
| COL6A2  | collagen, type VI, alpha 2                                              |
| FGF18   | fibroblast growth factor 18                                             |
| COL3A1  | collagen, type III, alpha 1                                             |
| TNC     | tenascin C                                                              |
| COL4A4  | collagen, type IV, alpha 4                                              |

Table S6 The sequences of primers used for qRT-PCR assay

| Gene symbol | Forward                    | Reverse                     |
|-------------|----------------------------|-----------------------------|
| hPDGFB      | 5'CTCGATCCGCTCCTTTGATGA3'  | 5'CGTTGGTGCGGTCTATGAG3'     |
| hFGFR4      | 5'GCACTGGAGTCTCGTGATGG3'   | 5'CCACAGCGTTCTCTACCAGG3'    |
| hSGK1       | 5'AGGATGGGTCTGAACGACTTT3'  | 5'GCCCTTCCGATCACTTTCAAG3'   |
| hCASP9      | 5'CTCAGACCAGAGATTCGCAAAC3' | 5'GCATTTCCCCTCAAACCTCTCAA3' |
| mp65        | 5'AGGCTTCTGGGCCTTATGTG3'   | 5'TGCTTCTCTCGCCAGGAATAC3'   |
| mStat3      | 5'CAATACCATTGACCTGCCGAT3'  | 5'GAGCGACTCAAACCTGCCCT3'    |
| mRelB       | 5'CCGTACCTGGTCATCACAGAG3'  | 5'CAGTCTCGAAGCTCGATGGC3'    |
| mNrf2       | 5'CTGTTCGGGAGCGTGAAA3'     | 5'CAGTAGCAAACCTTGCCCCCTT3'  |
